1 **Circ\_0005962 functions as an oncogene to aggravate non-small cell lung cancer**  
2 **progression via circ\_0005962/miR-382-5p/PDK4 regulatory network**

3

4 Zhihong Zhang<sup>1</sup>, Zhenxiu Shan<sup>1</sup>, Rubin Chen<sup>2</sup>, Xiaorong Peng<sup>3</sup>, Bin Xu<sup>1</sup>, Liang Xiao<sup>4</sup>,  
5 and Guofei Zhang<sup>5\*</sup>

6 <sup>1</sup>Department of Oncology, Gong'an County People's Hospital, Hubei 433000, China;

7 <sup>2</sup>Department of Radiology, Gong'an County People's Hospital, Hubei 433000, China;

8 <sup>3</sup>Department of Pathology, Gong'an County People's Hospital, Hubei 433000, China;

9 <sup>4</sup>Department of Cerebral Surgery, Gong'an County People's Hospital, Hubei 433000,  
10 China;

11 <sup>5</sup>Department of Gastrointestinal Surgery, Gong'an County People's Hospital, Hubei  
12 433000, China;

13

14 **\*Corresponding Author:** Guofei Zhang, Department of Gastrointestinal Surgery,  
15 Gong'an County People's Hospital, No. 119, Chan Ling Road, Douhudi Town,  
16 Gong'an County, Jingzhou 433000, Hubei. Tel: +86 716-5234334, E-mail:  
17 hwzvkl@163.com

18

19

20

21 **Running title:** Circ\_0005962 promotes NSCLC progression

22

23

24

25

26 **Abstract**

27 Non-small cell lung cancer (NSCLC) is a leading threat to human lives with high  
28 incidence and mortality. Circular RNAs (circRNAs) were reported to play important  
29 roles in human cancers. The purpose of this study was to investigate the role of  
30 circ\_0005962 and explore the underlying functional mechanisms. The expression of

31 circ\_0005962, miR-382-5p and pyruvate dehydrogenase kinase 4 (PDK4) was  
32 detected by quantitative real-time polymerase chain reaction (qRT-PCR). Cell  
33 proliferation and cell apoptosis were assessed by cell counting kit-8 (CCK-8) assay  
34 and flow cytometry assay, respectively. The protein levels of Beclin 1, light chain3  
35 (LC3-II/LC3-I), PDK4, Cleaved Caspase 3 (C-caspase 3) and proliferating cell  
36 nuclear antigen (PCNA) were examined using western blot analysis. Glycolysis was  
37 determined according to the levels of glucose consumption and lactate production.  
38 The interaction between miR-382-5p and circ\_0005962 or PDK4 was predicted by the  
39 online tool CircInteractome or starbase and verified by dual-luciferase reporter assay  
40 and RNA immunoprecipitation (RIP) assay. Xenograft model was constructed to  
41 investigate the role of circ\_0005962 *in vivo*. circ\_0005962 expressed with a high level  
42 in NSCLC tissues and cells. Circ\_0005962 knockdown inhibited proliferation,  
43 autophagy, and glycolysis but promoted apoptosis in NSCLC cells. MiR-382-5p was  
44 targeted by circ\_0005962, and its inhibition reversed the role of circ\_0005962  
45 knockdown. Besides, PDK4, a target of miR-382-5p, was regulated by circ\_0005962  
46 through miR-382-5p, and its overexpression abolished the effects of miR-382-5p  
47 reintroduction. Circ\_0005962 knockdown suppressed tumor growth *in vivo*.  
48 Circ\_0005962 knockdown restrained cell proliferation, autophagy, and glycolysis but  
49 stimulated apoptosis through modulating the circ\_0005962/miR-382-5p/PDK4 axis.  
50 Our study broadened the insights into understanding the mechanism of NSCLC  
51 progression.

52 **Key words:** circ\_0005962, miR-382-5p, PDK4, NSCLC

53

## 54 **Introduction**

55 Lung cancer is a leading cause of cancer-related death worldwide (Magnuson et al.,  
56 2016). Lung cancer is the second most common cancer among men and women:  
57 second only to prostate cancer in men, and second only to breast cancer in women  
58 (Testa et al., 2018). Non-small cell lung cancer (NSCLC) and small cell lung cancer  
59 are two types of lung cancer, and NSCLC accounts for about 85% of all lung cancer  
60 cases (Zhukovsky et al., 2014). NSCLC, including large cell carcinoma, squamous

61 cell carcinoma, and adenocarcinoma, is associated with high incidence and mortality  
62 (Barnett et al., 2016; Brody, 2014). Clinically, treatment modalities, including  
63 chemotherapy and surgery, are used to treat NSCLC, but the 5-year overall survival  
64 rate for all stages of NSCLC patients is only 16% (Laskin et al., 2005; Testa et al.,  
65 2018). The severe situation of NSCLC treatment makes it urgent to further explore the  
66 mechanism of occurrence and development of NSCLC to establish novel therapeutic  
67 strategies.

68 Circular RNAs (circRNAs) belong to non-coding RNAs and derive from  
69 alternative and back-splicing of precursor mRNAs. CircRNAs are mostly detected in  
70 the cytoplasm and function as competing endogenous RNAs (ceRNAs) to work as  
71 microRNA (miRNA) sponges (Hansen et al., 2013; Kulcheski et al., 2016; Salzman et  
72 al., 2012). Advances of high-throughput RNA sequencing in the identification of  
73 circRNAs hinted that circRNAs participated in the pathogenesis of cancers (Liang et  
74 al., 2014). Recent studies stated that circRNAs played vital roles in the development  
75 of NSCLC. For example, circ\_100146 functioned as an oncogene, and its suppression  
76 hindered cell proliferation and invasion (L. Chen et al., 2019). CircP4HB showed a  
77 high level in NSCLC, promoted epithelial-mesenchymal transition (EMT), and was  
78 associated with metastatic diseases (T. Wang et al., 2019). CircRNA F-circEA-2a  
79 contributed to cell migration and invasion but had little role in cell proliferation (Tan  
80 et al., 2018). A former study obtained dozens of circRNAs through the CircBase  
81 database and CSCD database for comparison between lung adenocarcinoma tissues  
82 and paired non-tumor tissues (Liu et al., 2019), and circ\_0005962, back-spliced from  
83 tyrosine 3-monooxygenase/tryptophan 5-monooxygenase activation protein zeta  
84 (YWHAZ), was one of the significantly upregulated circRNAs and had valuable  
85 prognostic significance. However, the understanding of the specific roles of  
86 circ\_0005962 in NSCLC remains lacking and requires further exploration.

87 It is well documented that miRNAs are involved in the biological processes of  
88 cancers. MiRNAs are known as small non-coding RNAs with 18~23 nucleotides  
89 (Jiang et al., 2014). MiRNAs play vital roles in tumor formation, growth and  
90 metastasis by acting as oncogenes or tumor suppressor genes. Among these miRNAs,

91 miR-382-5p was frequently mentioned in different cancers, including glioma, oral  
92 squamous cell carcinoma and breast cancer (Ho et al., 2017; Sun et al., 2019; J. Wang,  
93 C. Chen, et al., 2019). Unfortunately, the role of miR-382-5p in NSCLC is unknown,  
94 and we attempted to investigate the function of miR-382-5p in NSCLC cells.

95 One of the important functions of pyruvate dehydrogenase kinase (PDK) is to  
96 regulate the metabolic conversion from mitochondrial respiration to cytoplasmic  
97 glycolysis (Jeoung, 2015). Glycolysis is a preferential way for tumor cells to obtain  
98 energy (Vander Heiden et al., 2009). Pyruvate dehydrogenase kinase 4 (PDK4) is one  
99 of the PDK family protein kinases and located on chromosome 7q21.3 (J. Wang, Y.  
100 Qian, et al., 2019). PDK4 was reported to be implicated in numerous cellular  
101 activities, such as cell proliferation, metastasis, drug resistance, glycolysis and  
102 autophagy in different types of cancers (Feng et al., 2019; J. Wang, Y. Qian, et al.,  
103 2019; Yang et al., 2019). The specific role of PDK4 and associated action mechanisms  
104 in NSCLC still need to be explored to expand the function of PDK4 in cancers.

105 In the present study, we measured the expression of circ\_0005962 in NSCLC  
106 tissues and cells. Functional analyses revealed the role of circ\_0005962 in cell  
107 proliferation, autophagy, glycolysis and apoptosis. Besides, we constructed  
108 circRNA-miRNA-mRNA regulatory axis to expound the potential mechanism of  
109 circ\_0005962 in NSCLC. Our study aimed to provide new sights for the  
110 understanding of NSCLC development and supply promising biomarkers.

111

## 112 **Materials and methods**

### 113 **Tissues and cell lines**

114 A total of 45 tumor tissues and adjacent normal tissues from NSCLC patients were  
115 collected from Gong'an County People's Hospital. Informed consent was signed by  
116 each subject. All tissues were immediately placed into liquid nitrogen and stored at  
117 -80°C ultra low-temperature refrigerator. This research obtained the approval of the  
118 Ethics Committee of Gong'an County People's Hospital.

119 NSCLC cell lines (A549 and HCC827) and human bronchial epithelial cells  
120 (BEAS-2B) were purchased from Zishi Biotechnology (Shanghai, China). A549 and

121 HCC827 cells were maintained in 90% Roswell Park Memorial Institute 1640 (RPMI  
122 1640; Sigma, St. Louis, MO, USA) containing 10% fetal bovine serum (FBS; Sigma).  
123 BEAS-2B cells were cultured in 90% Dulbecco's Modified Eagle Medium (DMEM;  
124 Sigma) containing 10% FBS (Sigma). All mediums were placed at 37°C containing 5%  
125 CO<sub>2</sub>.

126

### 127 **Quantitative real-time polymerase chain reaction (qRT-PCR)**

128 Trizol reagent (Beyotime, Shanghai, China) was utilized to isolate total RNA from  
129 tissues and cells. The complementary DNA (cDNA) was assembled using the  
130 riboSCRIPT Reverse Transcription Kit (Ribobio, Guangzhou, China). Then the  
131 amplification reaction was carried out using SYBR Green Master PCR mix (Beyotime)  
132 through the ABI 7900 system (Applied Biosystems, Foster City, CA, USA). The  
133 relative expression was normalized by Glyceraldehyde-3-phosphate dehydrogenase  
134 (GAPDH) or small nuclear RNA U6 and calculated using  $2^{-\Delta\Delta C_t}$  method. The primers  
135 used were listed as below: circ\_0005962, forward (F):  
136 5'-AACTCCCCAGAGAAAGCCTGC-3' and reverse (R): 5'-  
137 TGCTTGTGAAGCATTGGGGAT-3'; YWHAZ, forward (F): 5'- ACTTTTGGTACA  
138 TTGTGGCTTCAA-3' and reverse (R): 5'-CCGCCAGGACAAACCAGTAT-3';  
139 PDK4, F: 5'-GGAGCATTCTCGCGCTACA-3' and R:  
140 5'-ACAGGCAATTCTTGTCGCAAA-3'; GAPDH, F: 5'-  
141 CTGGGCTACTGAGCACC-3' and R: 5'-AAGTGGTCGTTGAGGGCAATG-3';  
142 miR-382-5p, F: 5'-ATCCGTGAAGTTGTTCGTGG-3' and R: 5'-  
143 TATGGTTGTAGAGGACTCCTTGAC-3'; U6, F: 5'-  
144 GCUUCGGCAGCACAUUAUACUAAAAU-3' and R: 5'-  
145 CGCUUCACGAAUUUGCGUGUCAU-3'.

146

### 147 **RNase R treatment**

148 To confirm the stability and tolerance of circ\_0005962, the RNA extraction was  
149 probed with or without RNase R (Applied Biological Materials Inc., Vancouver,  
150 Canada) at 37°C for 10 min. Then, the qRT-PCR analysis was conducted as described

151 above.

152

### 153 **Cell transfection**

154 Small interference RNA against circ\_0005962 and negative control were synthesized  
155 by Sangon Biotech (Shanghai, China). The mimics of miR-382-5p (miR-382-5p), the  
156 inhibitor of miR-382-5p (anti-miR-382-5p) and respective negative control (NC or  
157 anti-NC) were purchased from Ribobio (Shanghai, China). The overexpression of  
158 circ\_0005962 (circ\_0005962) was performed as the previous study described (Y.  
159 Wang, J. Zhang, et al., 2019) and constructed by Genechem (Shanghai, China), while  
160 the specific plasmid without the circ\_0005962 cDNA was served as control (circ-NC).  
161 The vector pcDNA3.1-PDK4 (PDK4) for the overexpression of PDK4 and the control  
162 pcDNA empty vector (vector) were constructed by Sangon Biotech. Lentiviral vector  
163 (Lenti-short hairpin) for stable NEAT1 downregulation (Lv-sh-circ\_0005962) and  
164 corresponding negative control (Lv-sh-NC) were obtained from Genechem. Cell  
165 transfection was conducted by using Lipofectamine 3000 (Invitrogen, Carlsbad, CA,  
166 USA). Transfection efficiency and following experiments were implemented after 48h  
167 of transfection.

168

### 169 **Cell counting kit-8 (CCK-8) assay**

170 Cell proliferation was investigated by CCK-8 assay. A549 or HCC827 cells with  
171 different transfection were seeded into 96-well plates ( $5 \times 10^3$  cells/well). Then, cells  
172 were interacted with CCK-8 solution (Beyotime) for continuing 2 h at 24, 48, and 72  
173 h. The absorbance at 450 nm was measured using a microplate reader (Bio-Rad,  
174 Hercules, CA, USA).

175

### 176 **Flow cytometry assay**

177 Flow cytometry was applied to monitor cell apoptosis. After 48 h, A549 or HCC827  
178 cells with different transfection were washed with phosphate buffer saline (PBS),  
179 probed with 0.25% trypsin and resuspended in binding buffer. Afterward, the Annexin  
180 V-fluorescein isothiocyanate (FITC)/propidium iodide (PI) apoptosis detection kit

181 (Sigma) was used to doubly stain cells for 15 min in the dark. Eventually, the  
182 apoptotic cells were sorted using CellQuest software under a flow cytometer (Becton  
183 Dickinson, Franklin Lakes, NJ, USA).

184

### 185 **Western blot**

186 The western blot analysis was performed in line with a previous study described (W.  
187 Ren et al., 2019). In brief, total proteins were separated and transferred into  
188 polyvinylidene fluoride (PVDF) membranes (Bio-Rad). After the block, the  
189 membranes were incubated with the primary antibodies and the secondary antibodies.  
190 Finally, the seeking proteins were visualized using the enhanced chemiluminescent  
191 reagent (Beyotime) through an imaging system (Bio-Rad). The antibodies used were  
192 listed as follows: anti-Becclin 1 (1:1000; cat. no. ab210498; Abcam, Cambridge, MA,  
193 USA), anti-light chain3 (LC3) (1:2000; cat. no. ab192890), anti-PDK4 (1:1000; cat.  
194 no. ab89295), anti-Cleaved Caspase 3 (C-caspase 3) (1:1000; cat. no. ab2302), anti-  
195 proliferating cell nuclear antigen (PCNA) (1:1000; cat. no. ab92552), anti-GAPDH  
196 (1:1000; cat. no. ab8245) and the horseradish peroxidase-conjugated secondary  
197 antibodies (1:5000; cat. no. ab205718).

198

### 199 **The detection of glucose consumption and lactate production**

200 A549 or HCC827 cells with different transfection were planted into 96-well plates.  
201 After 48 h, cells were collected, washed three times with PBS, and then used for the  
202 detection of glucose consumption and lactate production using the Glucose Uptake  
203 Colorimetric Assay Kit and Lactate Assay Kit (Sigma) in agreement with the  
204 manufacturer's instructions.

205

### 206 **Bioinformatics analysis**

207 The targets of circRNA and miRNA were forecasted, and their binding sites were  
208 analyzed by the online bioinformatics tool CircInteractome  
209 (<https://circinteractome.nia.nih.gov/>) and starbase (<http://starbase.sysu.edu.cn/>).

210

211 **Dual-luciferase reporter assay**

212 Dual-luciferase reporter assay was carried out for the verification of the relationship  
213 between miR-382-5p and circ\_0005962 or PDK4. The partial frame of circ\_0005962  
214 containing the binding site or mutant binding site (wild-type or mutant-type) with  
215 miR-382-5p was amplified and cloned into the downstream of pGL4 vector (Promega,  
216 Madison, WI, USA) to generate circ\_0005962-wt and circ\_0005962-mut fusion  
217 plasmids. Likewise, the 3' UTR sequences of PDK4 harboring the binding site with  
218 miR-382-5p or mutant binding site (wild-type or mutant-type) were also amplified  
219 and inserted into the downstream of pGL4 vector to generate PDK4-wt and PDK-mut  
220 fusion plasmids. Subsequently, these fusion plasmids and miR-382-5p or NC were  
221 co-transfected into A549 and HCC827 cells, respectively. After 48 h, the cells were  
222 collected and detected using the Dual-luciferase assay system (Promega). The firefly  
223 luciferase activity was normalized by Renilla luciferase activity.

224

225 **RNA immunoprecipitation (RIP) assay**

226 RIP assay was executed to further confirm the relationship between miR-382-5p and  
227 circ\_0005962 or PDK4. In one case, A549 and HCC827 cells were harvested and  
228 incubated with RNA lysis buffer. Then, cell lysate was incubated with RIP binding  
229 buffer containing magnetic beads coated with human Ago2 antibody or mouse IgG  
230 antibody (control) (Millipore, Billerica, MA, USA). Subsequently, the levels of  
231 circ\_0005962 and miR-382-5p enriched in the beads were detected by qRT-PCR. In  
232 another case, A549 and HCC827 cells transfected with miR-382-5p were lysed in RIP  
233 buffer with anti-Ago2- or IgG-bound magnetic beads. Next, the mRNA level of PDK4  
234 enriched in the beads was examined by qRT-PCR.

235

236 ***In vivo* experiment**

237 The mice experiment obtained the approval of the Animal Care and Use Committee of  
238 Gong'an County People's Hospital. A total of 10 BALB/c nude mice (five-week-old,  
239 male) were purchased from HFK Bioscience (Beijing, China). A549 cells with  
240 Lv-sh-circ\_0005962 or Lv-sh-NC transfection were subcutaneously injected into the



241 back right flank of nude mice, dividing into the Lv-sh-circ\_0005962 group and  
242 Lv-sh-NC group. Tumor volume was observed and recorded once a week following  
243 the algorithm ( $\text{length} \times \text{width}^2 \times 0.5$ ), lasting 5 weeks. In the end, the mice were killed,  
244 and tumor samples were removed for weighting and further molecular studies.

245

#### 246 **Data analysis**

247 The data were obtained from at least 3 times independent experiments analysis and  
248 conducted using SPSS 18.0 software (SPSS, Inc., Chicago, IL, USA). The survival  
249 curve was depicted via the Kaplan-Meier method. The correlation analysis was  
250 performed based on Spearman's correlation coefficient. The differences between 2  
251 groups were analyzed by Student's *t*-test or one-way analysis of variance among  
252 multiple groups. The data after processing were presented as the mean  $\pm$  standard  
253 deviation (SD), and  $P < 0.05$  was considered to be statistically significant.

254

#### 255 **Result**

##### 256 **High expression of circ\_0005962 was observed in NSCLC tissues and cells and** 257 **predicted the low survival rate of NSCLC patients**

258 The expression of circ\_0005962 was detected in NSCLC tissues and cell lines to  
259 observe whether circ\_0005962 aberrantly regulated in NSCLC. As shown in Figure  
260 1A, the expression of circ\_0005962 was significantly higher in tumor tissues (n=45)  
261 than that in adjacent normal tissues (n=45). Besides, the expression of circ\_0005962  
262 was abundant in A549 and HCC827 cells relative to BEAS-2B cells (Figure 1B).  
263 Moreover, the survival curve was depicted utilizing Kaplan-Meier survival rate  
264 analysis according to the living status of NSCLC patients, and we found that the  
265 survival rate of patients with high expression of circ\_0005962 was notably weaker  
266 than patients with low circ\_0005962 expression (Figure 1C). Additionally, the result  
267 of qRT-PCR showed that the expression of circ\_0005962 in RNase R+ group  
268 decreased a little compared with that in RNase R- group, while the expression of the  
269 parental linear mRNA (YWHAZ) was significantly reduced with the treatment of  
270 RNase R, indicating that circ\_0005962 was resistant to RNase R (Figure 1D). The

271 data indicated that circ\_0005962 was aberrantly upregulated in NSCLC.

272

273 **Circ\_0005962 knockdown inhibited proliferation, autophagy, and glycolysis but**  
274 **promoted apoptosis in NSCLC cells**

275 The endogenous level of circ\_0005962 was knocked down to investigate the role of  
276 circ\_0005962 in NSCLC cells. Si-circ\_0005962 was inserted into the mature  
277 sequence of circ\_0005962 to reduce circ\_0005962 expression, si-NC acting as a  
278 control (Figure 2A). Then, the knockdown efficiency was examined by qRT-PCR, and  
279 the result showed that the expression of circ\_0005962 in A549 and HCC827 cells  
280 with si-circ\_0005962#1, si-circ\_0005962#2 and si-circ\_0005962#3 transfection was  
281 notably decreased than that with si-NC transfection, and the knockdown efficiency in  
282 the si-circ\_0005962#1 group was the highest (Figure 2B). Hence, si-circ\_0005962#1  
283 was chosen for the following analyses. The result of CCK-8 assay revealed that the  
284 cell proliferation was prominently suppressed in A549 and HCC827 cells transfected  
285 with si-circ\_0005962#1 (Figure 2C). On the contrary, flow cytometry assay presented  
286 that the apoptosis rate in A549 and HCC827 cells with si-circ\_0005962#1 transfection  
287 was inversely enhanced (Figure 2D). Besides, the protein levels of autophagy-related  
288 markers were quantified to assess the change of autophagy, and we found that the  
289 levels of Beclin 1 and LC3-II/LC3-I were declined with circ\_0005962 knockdown  
290 (Figure 2E and 2F). Moreover, the levels of glucose in culture medium and lactate  
291 production were checked to assess glycolysis progression, and we noticed that the  
292 level of existing glucose in A549 and HCC827 cells with si-circ\_0005962#1  
293 transfection was higher than that with si-NC transfection, suggesting that the  
294 consumptive glucose was reduced (Figure 2G). The level of lactate production was  
295 significantly blocked in A549 and HCC827 cells with si-circ\_0005962#1 transfection  
296 relative to si-NC (Figure 2H). All data clarified that circ\_0005962 knockdown  
297 inhibited proliferation, autophagy, and glycolysis but induced apoptosis in NSCLC  
298 cells.

299

300 **MiR-382-5p was a target of circ\_0005962**

301 Generally, circ\_0005962 functioned by acting as a ceRNA to modulate the expression  
302 of target miRNAs. The putative target miRNAs were predicted by the online tool  
303 CircInteractome, and miR-382-5p was one of target miRNAs of circ\_0005962 with  
304 specific binding sites (Figure 3A). To ascertain the relationship between circ\_0005962  
305 and miR-382-5p, dual-luciferase reporter assay and RIP assay were performed. The  
306 luciferase activity in A549 and HCC827 cells with circ\_0005962-wt and miR-382-5p  
307 transfection was substantially decreased compared with circ\_0005962-wt and NC  
308 transfection, while the luciferase activity in A549 and HCC827 cells with  
309 circ\_0005962-mut and miR-382-5p transfection was no difference compared with  
310 circ\_0005962-mut and NC transfection (Figure 3B). The RIP analysis detected the  
311 higher expression of circ\_0005962 and miR-382-5p in the Ago2 pellet of A549 and  
312 HCC827 lysate than that in the IgG control (Figure 3C). Moreover, the qRT-PCR  
313 analysis exhibited that the expression of miR-382-5p was notably declined with  
314 circ\_0005962 overexpression but improved with circ\_0005962 knockdown in A549  
315 and HCC827 cells (Figure 3D). Additionally, the expression of miR-382-5p in  
316 NSCLC tumor tissues (n=45) was markedly weaker than that in normal tissues (n=45)  
317 (Figure 3E). The expression of miR-382-5p in A549 and HCC827 cells was  
318 consistently lower than that in BEAS-2B cells (Figure 3F). Spearman's correlation  
319 coefficient revealed that circ\_0005962 expression was negatively correlated with  
320 miR-382-5p expression in NSCLC tissues (Figure 3G). These analyses maintained  
321 that miR-382-5p was a target of circ\_0005962, and its expression was regulated by  
322 circ\_0005962.

323

#### 324 **Inhibition of miR-382-5p reversed the role of circ\_0005962 knockdown in** 325 **NSCLC cells**

326 A549 and HCC827 cells were introduced with si-circ\_0005962#1, si-NC,  
327 si-circ\_0005962#1+anti-miR-382-5p and si-circ\_0005962#1+anti-NC, respectively.  
328 First, the expression of miR-382-5p in these transfected cells was checked, and we  
329 found that the expression of miR-382-5p was enhanced in the si-circ\_0005962#1 but  
330 inhibited in the si-circ\_0005962#1+anti-miR-382-5p group (Figure 4A). The cell

331 proliferation inhibited by si-circ\_0005962#1 was recovered in A549 and HCC827  
332 cells with si-circ\_0005962#1+anti-miR-382-5p transfection (Figure 4B). The elevated  
333 cell apoptosis rate in cells with si-circ\_0005962#1 transfection was suppressed in  
334 cells with si-circ\_0005962#1+anti-miR-382-5p transfection (Figure 4C). The protein  
335 levels of Beclin 1 and LC3-II/LC3-I were depleted in A549 and HCC827 cells  
336 transfected with si-circ\_0005962#1 but restored in cells transfected with  
337 si-circ\_0005962#1+anti-miR-382-5p (Figure 4D and 4E). The level of existing  
338 glucose in medium in the si-circ\_0005962#1+anti-miR-382-5p group was declined  
339 than that in the si-circ\_0005962#1 group (Figure 4F). The level of lactate production  
340 inhibited in the si-circ\_0005962#1 group was promoted in the  
341 si-circ\_0005962#1+anti-miR-382-5p group (Figure 4G). These results meant that  
342 circ\_0005962 knockdown inhibited proliferation, autophagy, and glycolysis but  
343 induced apoptosis through enhancing the expression of miR-382-5p.

344

#### 345 **PDK4 was a target of miR-382-5p**

346 CircRNA-miRNA-mRNA regulatory network is an important mechanism  
347 participating in the development of human cancers. The target mRNAs of miR-382-5p  
348 were analyzed to observe that whether circ\_0005962 functioned following this  
349 mechanism. Online bioinformatics tool starbase predicted that PDK4 was one of  
350 targets of miR-382-5p with a specific binding site at its 3' UTR (Figure 5A). Besides,  
351 miR-382-5p overexpression predominantly inhibited the luciferase activity in A549  
352 and HCC827 cells transfected with PDK4-wt but not PDK4-mut (Figure 5B).  
353 Moreover, the enrichment of PDK4 was notably elevated in the  
354 miR-382-5p-transfected group compared with that in the NC group after Ago2 RIP,  
355 while enrichment of PDK4 after IgG RIP showed no efficacy (Figure 5C). Next, the  
356 western blot analysis monitored that the level of PDK4 was weakened in A549 and  
357 HCC827 cells with miR-382-5p transfection but elevated in cells with  
358 circ\_0005962+miR-382-5p transfection (Figure 5D). Also, the expression of PDK4  
359 was detected in NSCLC tumor tissues, and the result presented that the expression of  
360 PDK4 at both mRNA and protein levels was abnormally higher in NSCLC tumor

361 tissues (n=45) relative to normal tissues (n=45) (Figure 5E and 5F). Likewise, the  
362 protein level of PDK4 in A549 and HCC827 cells was also enhanced compared to  
363 BEAS-2B cells (Figure 5G). Furthermore, the mRNA level of PDK4 was positively  
364 correlated with circ\_0005962 level but negatively correlated with the miR-382-5p  
365 level in NSCLC tumor tissues (Figure 5H and 5I). All data suggested that PDK4 was a  
366 target of miR-382-5p and regulated by miR-382-5p and circ\_0005962.

367

### 368 **PDK4 overexpression abolished the role of miR-382-5p reintroduction in NSCLC** 369 **cells**

370 A549 and HCC827 cells were introduced with miR-382-5p, NC, miR-382-5p+PDK4  
371 and miR-382-5p+vector, respectively. The expression of PDK4 was examined to  
372 assess transfection efficiency, and the result showed that the level of PDK4 was  
373 obviously reduced in cells transfected with miR-382-5p but regained in cells  
374 transfected with miR-382-5p+PDK4 (Figure 6A). Afterwards, the cell proliferation  
375 was inhibited by miR-382-5p reintroduction but promoted by the combination of  
376 miR-382-5p reintroduction and PDK4 overexpression (Figure 6B). The apoptosis rate  
377 was elevated by miR-382-5p reintroduction but restrained by the combination of  
378 miR-382-5p reintroduction and PDK4 overexpression (Figure 6C). Moreover, the  
379 levels of Beclin1 and LC3-II/LC3-I were weakened in A549 and HCC827 cells  
380 transfected with miR-382-5p but rescued in cells transfected with miR-382-5p+PDK4  
381 (Figure 6D and 6E). The existing glucose level was abundant in the miR-382-5p  
382 group but reduced in the miR-382-5p+PDK4 group, suggesting that PDK4  
383 overexpression enhanced the level of glucose consumption inhibited by miR-382-5p  
384 reintroduction (Figure 6F). The level of lactate production was blocked by  
385 miR-382-5p reintroduction but recovered by the combination of miR-382-5p  
386 reintroduction and PDK4 overexpression (Figure 6G). These data hinted that  
387 miR-382-5p attenuated cell proliferation, autophagy, and glycolysis but contributed to  
388 apoptosis through inhibiting the expression of PDK4.

389

### 390 **Circ\_0005962 knockdown inhibited tumor growth *in vivo***

391 A549 cells with stable Lv-sh-circ\_0005962 transfection were subcutaneously injected  
392 into the groin of nude mice to determine the role of circ\_0005962 *in vivo*. As shown  
393 in Figure 7A and 7B, circ\_0005962 knockdown remarkably reduced the tumor  
394 volume and tumor weight. After injection for 5 weeks, all mice were killed, and the  
395 tumors were removed for expression analysis. The expression of circ\_0005962 and  
396 the mRNA level of PDK4 were noticeably declined in the Lv-sh-circ\_0005962 group,  
397 while the expression of miR-382-5p was conspicuously strengthened in the  
398 Lv-sh-circ\_0005962 group (Figure 7C). Besides, the protein level of PDK4 was  
399 consistent with its mRNA level. Additionally, the levels of apoptosis-related marker  
400 (C-caspase 3) and proliferation-related marker (PCNA) were monitored, and we  
401 discovered that the level of C-caspase 3 was reinforced, while the level of PCNA  
402 plummeted in the Lv-sh-circ\_0005962 group (Figure 7D). Collectively, circ\_0005962  
403 knockdown impeded tumor growth *in vivo*.

404

## 405 **Discussion**

406 NSCLC is a severe burden to people's lives, and the prognosis for patients is still  
407 unsatisfactory. The responses to existing standard therapies are poor, except for the  
408 most localized cancers (Lemjabbar-Alaoui et al., 2015). Hence, more novel  
409 mechanisms of NSCLC progression need to be explored so as to develop aimed  
410 therapeutic strategies for NSCLC. Here, we investigated the role of circ\_0005962 in  
411 NSCLC for the first time. Circ\_0005962 was observed to be aberrantly overexpressed  
412 in NSCLC tissues and cells. The functional analysis concluded that circ\_0005962  
413 knockdown attenuated NSCLC progression *in vitro* and *in vivo*. Stepwise  
414 identification manifested that circ\_0005962 could directly interact with miR-382-5p,  
415 leading to an increase of PDK4 expression, thereby contributing to the development  
416 of NSCLC. Our study illustrated the importance and carcinogenesis role of  
417 circ\_0005962 in NSCLC.

418 CircRNAs were documented to be dysregulated in numerous human cancers and  
419 took effects on apoptosis, autophagy, chemoresistance, metastasis and glycolysis (Chi  
420 et al., 2019; Kun-Peng et al., 2018; S. Ren et al., 2019; Wei et al., 2019). Up to now,

421 dozens of NSCLC-related circRNAs were screened and identified, such as  
422 circ\_100146, CIRC-PRMT5 and circ\_0026134 (Chang et al., 2019; L. Chen et al.,  
423 2019; Y. Wang, Y. Li, et al., 2019), leading to the malignant progression of NSCLC  
424 via acting as oncogenes. On the contrary, certain circRNAs, such as circPTPRA,  
425 circ\_circ\_00059621946 and circSMARCA5 were maintained as tumor suppressors to  
426 block NSCLC deterioration (Huang et al., 2019; Y. Wang, H. Li, et al., 2019; Wei et  
427 al., 2019). These data suggested the diverse roles of circRNAs in cancer development.  
428 Despite the fact that the role of several circRNAs was partly characterized, there were  
429 still existing circRNAs lacking functional exploration. A previous study predicted  
430 differentially expressed circRNAs in lung adenocarcinoma using Gene Expression  
431 Omnibus (GEO) dataset and found that circ\_0005962 was highly expressed in lung  
432 adenocarcinoma plasma and cells (Liu et al., 2019). In view of this finding, we  
433 speculated that dysregulation of circ\_0005962 might be associated with the malignant  
434 progression of NSCLC. Interestingly, we discovered that circ\_0005962 knockdown  
435 inhibited cell proliferation, autophagy and glycolysis but accelerated cell apoptosis  
436 through *in vitro* analyses. Besides, circ\_0005962 knockdown weakened tumor growth  
437 in nude mice *in vivo*, suggesting that circ\_0005962 was an oncogene at least in  
438 NSCLC progression.

439 The classic action way of circRNAs is as a sponge of miRNAs. In our study,  
440 miR-382-5p was identified as a target of circ\_0005962. The role of miR-382 in  
441 NSCLC gradually became clear to function as a tumor suppressor. For example,  
442 miR-382 suppressed proliferation and migration of NSCLC cells by binding to the 3'  
443 UTR of LMO3 (D. Chen et al., 2019). Besides, miR-382 was significantly  
444 downregulated in NSCLC tissues and cells, and enrichment of miR-382 depleted cell  
445 proliferation, migration and invasion through targeting SETD8 (Chen et al., 2017).  
446 Consistent with these findings, we also detected that miR-382-5p was weakly  
447 expressed in NSCLC cells, and reintroduction of miR-382-5p inhibited proliferation,  
448 autophagy and glycolysis of NSCLC cells. Besides, miR-382-5p inhibition reversed  
449 the regulatory effects of circ\_0005962 knockdown.

450 Considering the habitual action mode of miRNAs, we further analyzed the

451 potential target mRNAs of miR-382-5p to establish a detailed action mechanism of  
452 circ\_0005962 in NSCLC. Among the mRNAs whose levels were increased in A549  
453 and HCC827 cells, one of the most significant was PDK4. Similarly, PDK4 has been  
454 reported to be highly expressed in cisplatin-resistant lung adenocarcinoma (Yu et al.,  
455 2018). Besides, oncogene LINC00243 contributed to proliferation and glycolysis in  
456 NSCLC by positively regulating PDK4 (Feng & Yang, 2019). Consistently, we also  
457 noticed that PDK4 was upregulated in NSCLC tissues and cell lines. Moreover, PDK4  
458 overexpression eliminated the role of miR-382-5p reintroduction, leading to the  
459 malignant activities of NSCLC cells. These data indicated that PDK4 played a  
460 carcinogenic role in NSCLC.

461 Taken together, the expression of circ\_0005962 was increased in NSCLC tissues  
462 and cell lines. Knockdown of LINC00243 blocked cell proliferation, autophagy and  
463 glycolysis but accelerated cell apoptosis *in vitro* and weakened tumor growth *in vivo*.  
464 Besides, circ\_0005962 was a sponge of miR-382-5p, and PDK4 was a target of  
465 miR-382-5p. Circ\_0005962 functioned in NSCLC progression by inducing PDK4  
466 through sponging miR-382-5p. Our results not only corroborate the role of  
467 circ\_0005962 in NSCLC *in vitro* and *in vivo* but also provide the  
468 circ\_0005962/miR-382-5p/PDK4 regulatory axis, which may be promising to develop  
469 novel therapeutic approaches for NSCLC.

470

471

472

473

#### 474 **Acknowledgement**

475 None

476

#### 477 **Disclosure of interest**

478 The authors declare that they have no financial conflicts of interest.

479

#### 480 **Funding**



481 None

482

483 **Author contributions**

484 Conceptualization: Z.-H.Z.; Methodology: Z.-X.S., R.-B.C., X.-R.P.; Software:  
485 X.-R.P., B.-X., L.-X.; Validation: Z.-H.Z., Z.-X.S.; Formal analysis: G.-F.Z.;  
486 Investigation: Z.-X.S., R.-B.C., X.-R.P.; Resources: B.-X., L.-X.; Writing - original  
487 draft: Z.-H.Z.

488

489

490 **References**

491 **Barnett, S. A., Downey, R. J., Zheng, J., Plourde, G., Shen, R., Chaft, J., Akhurst,**  
492 **T., Park, B. J. and Rusch, V. W.** (2016). Utility of Routine PET Imaging to  
493 Predict Response and Survival After Induction Therapy for Non-Small Cell  
494 Lung Cancer. *Ann Thorac Surg* **101**, 1052-1059. doi:  
495 10.1016/j.athoracsur.2015.09.099

496 **Brody, H.** (2014). Lung cancer. *Nature* **513**, S1. doi: 10.1038/513S1a

497 **Chang, H., Qu, J., Wang, J., Liang, X. and Sun, W.** (2019). Circular RNA  
498 circ\_0026134 regulates non-small cell lung cancer cell proliferation and  
499 invasion via sponging miR-1256 and miR-1287. *Biomed Pharmacother* **112**,  
500 108743. doi: 10.1016/j.biopha.2019.108743

501 **Chen, D., Zhang, Y., Lin, Y., Shen, F., Zhang, Z. and Zhou, J.** (2019).  
502 MicroRNA-382 inhibits cancer cell growth and metastasis in NSCLC via  
503 targeting LMO3. *Exp Ther Med* **17**, 2417-2424. doi: 10.3892/etm.2019.7271

504 **Chen, L., Nan, A., Zhang, N., Jia, Y., Li, X., Ling, Y., Dai, J., Zhang, S., Yang, Q.,**  
505 **Yi, Y., et al.** (2019). Circular RNA 100146 functions as an oncogene through  
506 direct binding to miR-361-3p and miR-615-5p in non-small cell lung cancer.  
507 *Mol Cancer* **18**, 13. doi: 10.1186/s12943-019-0943-0

508 **Chen, T., Ren, H., Thakur, A., Yang, T., Li, Y., Zhang, S., Wang, T. and Chen, M.**  
509 (2017). miR-382 inhibits tumor progression by targeting SETD8 in non-small  
510 cell lung cancer. *Biomed Pharmacother* **86**, 248-253. doi:

- 511 10.1016/j.biopha.2016.12.007
- 512 **Chi, G., Xu, D., Zhang, B. and Yang, F.** (2019). Matrine induces apoptosis and  
513 autophagy of glioma cell line U251 by regulation of circRNA-104075/BCL-9.  
514 *Chem Biol Interact* **308**, 198-205. doi: 10.1016/j.cbi.2019.05.030
- 515 **Feng, X. and Yang, S.** (2019). Long non-coding RNA LINC00243 promotes  
516 proliferation and glycolysis in non-small cell lung cancer cells by positively  
517 regulating PDK4 through sponging miR-507. *Mol Cell Biochem* doi:  
518 10.1007/s11010-019-03635-3
- 519 **Hansen, T. B., Jensen, T. I., Clausen, B. H., Bramsen, J. B., Finsen, B., Damgaard,  
520 C. K. and Kjems, J.** (2013). Natural RNA circles function as efficient  
521 microRNA sponges. *Nature* **495**, 384-388. doi: 10.1038/nature11993
- 522 **Ho, J. Y., Hsu, R. J., Liu, J. M., Chen, S. C., Liao, G. S., Gao, H. W. and Yu, C. P.**  
523 (2017). MicroRNA-382-5p aggravates breast cancer progression by regulating  
524 the RERG/Ras/ERK signaling axis. *Oncotarget* **8**, 22443-22459. doi:  
525 10.18632/oncotarget.12338
- 526 **Huang, M. S., Liu, J. Y., Xia, X. B., Liu, Y. Z., Li, X., Yin, J. Y., Peng, J. B., Wu,  
527 L., Zhang, W., Zhou, H. H., et al.** (2019). Hsa\_circ\_0001946 Inhibits Lung  
528 Cancer Progression and Mediates Cisplatin Sensitivity in Non-small Cell Lung  
529 Cancer via the Nucleotide Excision Repair Signaling Pathway. *Front Oncol* **9**,  
530 508. doi: 10.3389/fonc.2019.00508
- 531 **Jeoung, N. H.** (2015). Pyruvate Dehydrogenase Kinases: Therapeutic Targets for  
532 Diabetes and Cancers. *Diabetes Metab J* **39**, 188-197. doi:  
533 10.4093/dmj.2015.39.3.188
- 534 **Jiang, C., Hu, X., Alattar, M. and Zhao, H.** (2014). miRNA expression profiles  
535 associated with diagnosis and prognosis in lung cancer. *Expert Rev Anticancer  
536 Ther* **14**, 453-461. doi: 10.1586/14737140.2013.870037
- 537 **Kulcheski, F. R., Christoff, A. P. and Margis, R.** (2016). Circular RNAs are miRNA  
538 sponges and can be used as a new class of biomarker. *J Biotechnol* **238**, 42-51.  
539 doi: 10.1016/j.jbiotec.2016.09.011
- 540 **Kun-Peng, Z., Xiao-Long, M., Lei, Z., Chun-Lin, Z., Jian-Ping, H. and**

- 541           **Tai-Cheng, Z.** (2018). Screening circular RNA related to chemotherapeutic  
542           resistance in osteosarcoma by RNA sequencing. *Epigenomics* **10**, 1327-1346.  
543           doi: 10.2217/epi-2018-0023
- 544   **Laskin, J. J. and Sandler, A. B.** (2005). State of the art in therapy for non-small cell  
545           lung cancer. *Cancer Invest* **23**, 427-442. doi: 10.1081/cnv-67172
- 546   **Lemjabbar-Alaoui, H., Hassan, O. U., Yang, Y. W. and Buchanan, P.** (2015). Lung  
547           cancer: Biology and treatment options. *Biochim Biophys Acta* **1856**, 189-210.  
548           doi: 10.1016/j.bbcan.2015.08.002
- 549   **Liang, D. and Wilusz, J. E.** (2014). Short intronic repeat sequences facilitate circular  
550           RNA production. *Genes Dev* **28**, 2233-2247. doi: 10.1101/gad.251926.114
- 551   **Liu, X. X., Yang, Y. E., Liu, X., Zhang, M. Y., Li, R., Yin, Y. H. and Qu, Y. Q.**  
552           (2019). A two-circular RNA signature as a noninvasive diagnostic biomarker  
553           for lung adenocarcinoma. *J Transl Med* **17**, 50. doi:  
554           10.1186/s12967-019-1800-z
- 555   **Magnuson, W. J., Yeung, J. T., Guillod, P. D., Gettinger, S. N., Yu, J. B. and**  
556           **Chiang, V. L.** (2016). Impact of Deferring Radiation Therapy in Patients With  
557           Epidermal Growth Factor Receptor-Mutant Non-Small Cell Lung Cancer Who  
558           Develop Brain Metastases. *Int J Radiat Oncol Biol Phys* **95**, 673-679. doi:  
559           10.1016/j.ijrobp.2016.01.037
- 560   **Ren, S., Liu, J., Feng, Y., Li, Z., He, L., Li, L., Cao, X., Wang, Z. and Zhang, Y.**  
561           (2019). Knockdown of circDENND4C inhibits glycolysis, migration and  
562           invasion by up-regulating miR-200b/c in breast cancer under hypoxia. *J Exp*  
563           *Clin Cancer Res* **38**, 388. doi: 10.1186/s13046-019-1398-2
- 564   **Ren, W., Wu, S., Wu, Y., Liu, T., Zhao, X. and Li, Y.** (2019).  
565           MicroRNA-196a/-196b regulate the progression of hepatocellular carcinoma  
566           through modulating the JAK/STAT pathway via targeting SOCS2. *Cell Death*  
567           *Dis* **10**, 333. doi: 10.1038/s41419-019-1530-4
- 568   **Salzman, J., Gawad, C., Wang, P. L., Lacayo, N. and Brown, P. O.** (2012).  
569           Circular RNAs are the predominant transcript isoform from hundreds of  
570           human genes in diverse cell types. *PLoS One* **7**, e30733. doi:

- 571 10.1371/journal.pone.0030733
- 572 **Sun, L. P., Xu, K., Cui, J., Yuan, D. Y., Zou, B., Li, J., Liu, J. L., Li, K. Y., Meng,**  
573 **Z. and Zhang, B.** (2019). Cancer-associated fibroblast-derived exosomal  
574 miR3825p promotes the migration and invasion of oral squamous cell  
575 carcinoma. *Oncol Rep* **42**, 1319-1328. doi: 10.3892/or.2019.7255
- 576 **Tan, S., Sun, D., Pu, W., Gou, Q., Guo, C., Gong, Y., Li, J., Wei, Y. Q., Liu, L.,**  
577 **Zhao, Y., et al.** (2018). Circular RNA F-circEA-2a derived from EML4-ALK  
578 fusion gene promotes cell migration and invasion in non-small cell lung cancer.  
579 *Mol Cancer* **17**, 138. doi: 10.1186/s12943-018-0887-9
- 580 **Testa, U., Castelli, G. and Pelosi, E.** (2018). Lung Cancers: Molecular  
581 Characterization, Clonal Heterogeneity and Evolution, and Cancer Stem Cells.  
582 *Cancers (Basel)* **10**, doi: 10.3390/cancers10080248
- 583 **Vander Heiden, M. G., Cantley, L. C. and Thompson, C. B.** (2009). Understanding  
584 the Warburg effect: the metabolic requirements of cell proliferation. *Science*  
585 **324**, 1029-1033. doi: 10.1126/science.1160809
- 586 **Wang, J., Chen, C., Yan, X. and Wang, P.** (2019). The role of miR-382-5p in glioma  
587 cell proliferation, migration and invasion. *Onco Targets Ther* **12**, 4993-5002.  
588 doi: 10.2147/OTT.S196322
- 589 **Wang, J., Qian, Y. and Gao, M.** (2019). Overexpression of PDK4 is associated with  
590 cell proliferation, drug resistance and poor prognosis in ovarian cancer.  
591 *Cancer Manag Res* **11**, 251-262. doi: 10.2147/CMAR.S185015
- 592 **Wang, T., Wang, X., Du, Q., Wu, N., Liu, X., Chen, Y. and Wang, X.** (2019). The  
593 circRNA circP4HB promotes NSCLC aggressiveness and metastasis by  
594 sponging miR-133a-5p. *Biochem Biophys Res Commun* **513**, 904-911. doi:  
595 10.1016/j.bbrc.2019.04.108
- 596 **Wang, Y., Li, H., Lu, H. and Qin, Y.** (2019). Circular RNA SMARCA5 inhibits the  
597 proliferation, migration, and invasion of non-small cell lung cancer by  
598 miR-19b-3p/HOXA9 axis. *Onco Targets Ther* **12**, 7055-7065. doi:  
599 10.2147/OTT.S216320
- 600 **Wang, Y., Li, Y., He, H. and Wang, F.** (2019). Circular RNA circ-PRMT5 facilitates

601 non-small cell lung cancer proliferation through upregulating EZH2 via  
602 sponging miR-377/382/498. *Gene* **720**, 144099. doi:  
603 10.1016/j.gene.2019.144099

604 **Wang, Y., Zhang, J., Li, J., Gui, R., Nie, X. and Huang, R.** (2019).  
605 CircRNA\_014511 affects the radiosensitivity of bone marrow mesenchymal  
606 stem cells by binding to miR-29b-2-5p. *Bosn J Basic Med Sci* **19**, 155-163. doi:  
607 10.17305/bjbms.2019.3935

608 **Wei, S., Zheng, Y., Jiang, Y., Li, X., Geng, J., Shen, Y., Li, Q., Wang, X., Zhao, C.,**  
609 **Chen, Y., et al.** (2019). The circRNA circPTPRA suppresses  
610 epithelial-mesenchymal transitioning and metastasis of NSCLC cells by  
611 sponging miR-96-5p. *EBioMedicine* **44**, 182-193. doi:  
612 10.1016/j.ebiom.2019.05.032

613 **Yang, R., Zhu, Y., Wang, Y., Ma, W., Han, X., Wang, X. and Liu, N.** (2019).  
614 HIF-1alpha/PDK4/autophagy pathway protects against advanced glycation  
615 end-products induced vascular smooth muscle cell calcification. *Biochem*  
616 *Biophys Res Commun* **517**, 470-476. doi: 10.1016/j.bbrc.2019.07.102

617 **Yu, S., Ren, H., Li, Y., Liang, X., Ning, Q., Chen, X., Chen, M. and Hu, T.** (2018).  
618 HOXA4-Dependent Transcriptional Activation of AXL Promotes Cisplatin-  
619 Resistance in Lung Adenocarcinoma Cells. *Anticancer Agents Med Chem* **18**,  
620 2062-2067. doi: 10.2174/1871520619666181203110835

621 **Zhukovsky, M., Varaksin, A. and Pakholkina, O.** (2014). Statistical analysis of  
622 observational study of the influence of radon and other risk factors on lung  
623 cancer incidence. *Radiat Prot Dosimetry* **160**, 108-111. doi:  
624 10.1093/rpd/ncu069

625

## 626 **Figure legends**

627 **Figure 1. Circ\_0005962 was highly expressed in NSCLC tissues and cells.** (A) The  
628 expression of circ\_0005962 in tumor tissues (n=45) and adjacent normal tissues (n=45)  
629 was detected by qRT-PCR. (B) The expression of circ\_0005962 in NSCLC cell lines  
630 (A549 and HCC827) and normal cells (BEAS-2B) was detected by qRT-PCR. (C) The

631 survival curve was depicted according to the Kaplan-Meier plot and analyzed by the  
632 log-rank test. (D) The tolerance of circ\_0005962 and corresponding linear RNA to  
633 RNase was measured according to their mRNA levels. \* $P < 0.05$ .

634 **Figure 2. Circ\_0005962 knockdown inhibited proliferation, autophagy, and**  
635 **glycolysis but contributed to apoptosis in NSCLC cells.** (A) The diagram of  
636 circ\_0005962 knockdown. (B) The efficiency of circ\_0005962 knockdown in  
637 different transfection lines was detected by qRT-PCR. A549 and HCC827 cells were  
638 transfected with si-circ\_0005962#1 or si-NC. (C) Cell proliferation was assessed by  
639 CCK-8 assay. (D) Cell apoptosis was executed by flow cytometry assay. (E and F)  
640 The protein levels of Beclin 1 and LC3-II/LC3-I were quantified by western blot. (G  
641 and H) The glycolysis progression was evaluated according to the level of glucose in  
642 culture medium and lactate production. \* $P < 0.05$ .

643 **Figure 3. MiR-382-5p was a target of circ\_0005962.** (A) The binding sites between  
644 circ\_0005962 and miR-382-5p were analyzed by the online tool CircInteractome. (B)  
645 The relationship between circ\_0005962 and miR-382-5p was verified by  
646 dual-luciferase reporter assay. (C) The relationship between circ\_0005962 and  
647 miR-382-5p was further confirmed by RIP assay. (D) The expression of miR-382-5p  
648 in A549 and HCC827 cells transfected with circ\_0005962 or si-circ\_0005962 was  
649 detected by qRT-PCR. (E and F) The expression of miR-382-5p in NSCLC tissues and  
650 cell lines was detected by qRT-PCR. (G) The correlation between circ\_0005962 and  
651 miR-382-5p was analyzed by Spearman's correlation coefficient. \* $P < 0.05$ .

652 **Figure 4. Inhibition of miR-382-5p reversed the role of circ\_0005962 knockdown.**  
653 A549 and HCC827 cells were introduced with si-circ\_0005962#1, si-NC,  
654 si-circ\_0005962#1+anti-miR-382-5p or si-circ\_0005962#1+anti-NC. (A) The  
655 transfection efficiency was examined by qRT-PCR. (B) Cell proliferation was  
656 assessed by CCK-8 assay. (C) Cell apoptosis was executed by flow cytometry assay.  
657 (D and E) The protein levels of Beclin 1 and LC3-II/LC3-I were quantified by  
658 western blot. (F and G) The glycolysis progression was evaluated according to the  
659 levels of glucose in culture medium and lactate production. \* $P < 0.05$ .

660 **Figure 5. PDK4 was a target of miR-382-5p.** (A) The binding sites between PDK4 3'

661 UTR and miR-382-5p were analyzed by online tool starbase. (B) The relationship  
662 between PDK4 and miR-382-5p was verified by dual-luciferase reporter assay. (C)  
663 The relationship between PDK4 and miR-382-5p was further confirmed by RIP assay.  
664 (D) The expression of PDK4 at the protein level in A549 and HCC827 cells  
665 transfected with miR-382-5p or circ\_0005962+miR-382-5p was detected by western  
666 blot. (E and F) The expression of PDK4 at mRNA and protein levels in NSCLC  
667 tissues was detected by qRT-PCR and western blot. (G) The protein level of PDK4 in  
668 NSCLC cell lines was detected by western blot. (H and I) The correlation between  
669 PDK4 and circ\_0005962 or miR-382-5p was analyzed by Spearman's correlation  
670 coefficient. \* $P < 0.05$ .

671 **Figure 6. PDK4 overexpression abrogated the role of miR-382-5p reintroduction.**

672 A549 and HCC827 cells were transfected with miR-382-5p, NC, miR-382-5p+PDK4  
673 or miR-382-5p+vector. (A) The transfection efficiency was checked according to the  
674 expression level of PDK4 using western blot. (B) Cell proliferation was assessed by  
675 CCK-8 assay. (C) Cell apoptosis was monitored by flow cytometry assay. (D and E)  
676 The protein levels of Beclin 1 and LC3-II/LC3-I were quantified by western blot. (F  
677 and G) The glycolysis progression was evaluated according to the level of glucose in  
678 culture medium and lactate production. \* $P < 0.05$ .

679 **Figure 7. Circ\_0005962 knockdown depleted tumor growth *in vivo*.**

680 The tumor volume was recorded once a week, lasting 5 weeks. (B) The tumor weight was  
681 measured after 5 weeks. (C) The expression of circ\_0005962, miR-382-5p and PDK  
682 was examined in excised tumor tissues by qRT-PCR. (D) The protein levels of PDK4,  
683 C-caspase 3 and PCNA were quantified by western blot. \* $P < 0.05$ .

684

**A**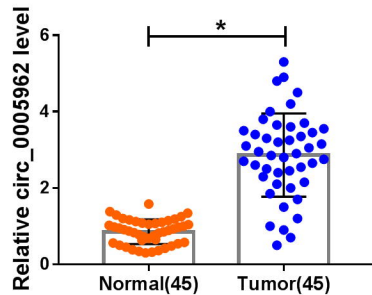**B**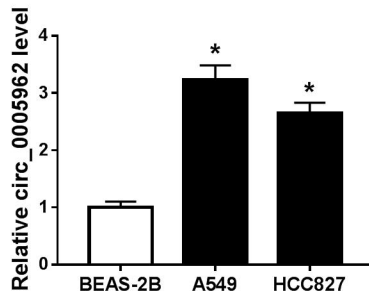**C**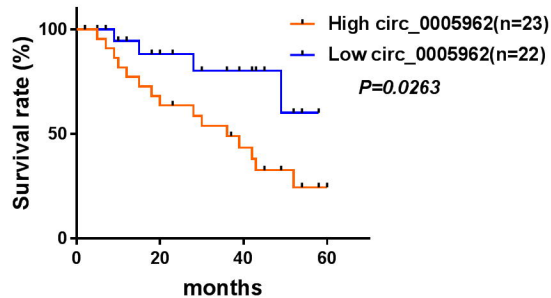**D**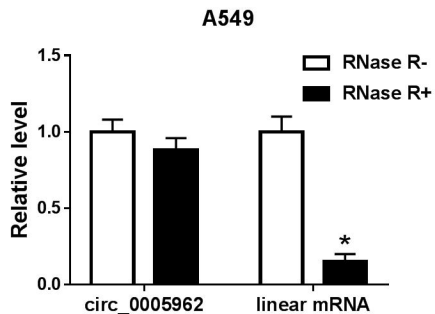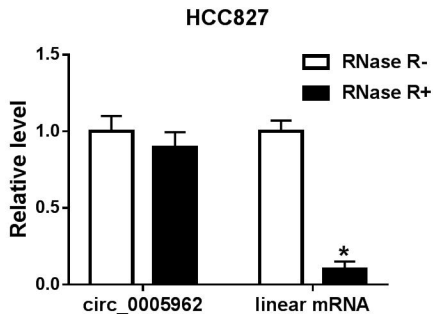



**A**

hsa\_circ\_0005962

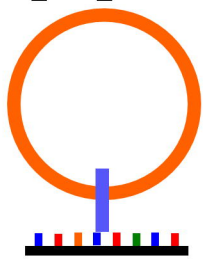

si-circ\_0005962    si-NC

**B**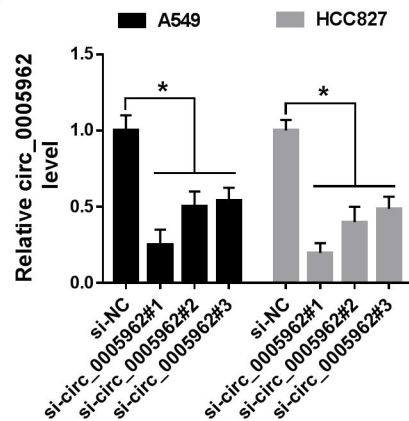**C**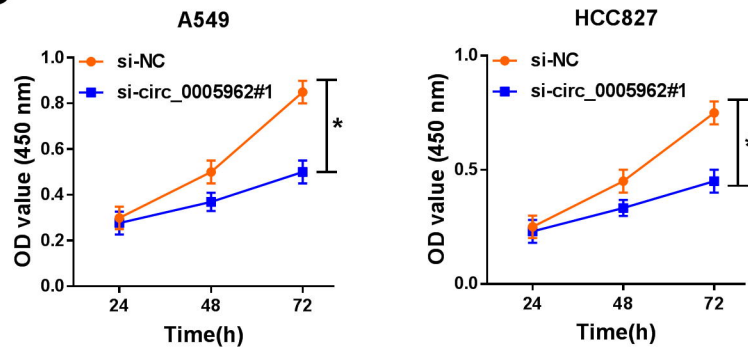**D**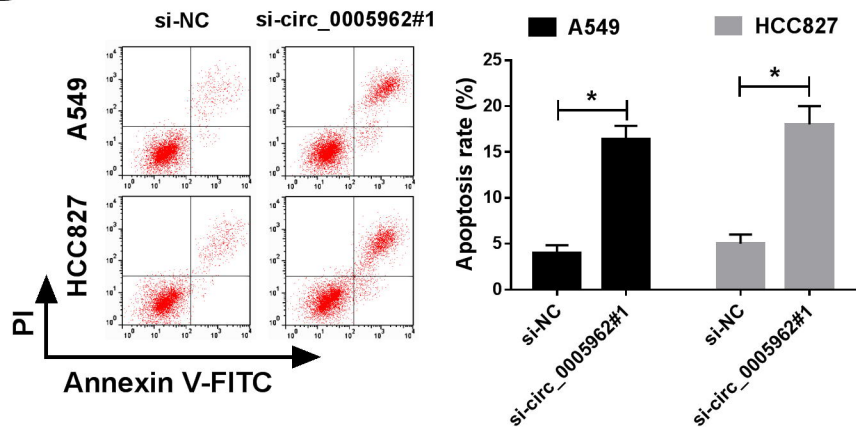**E**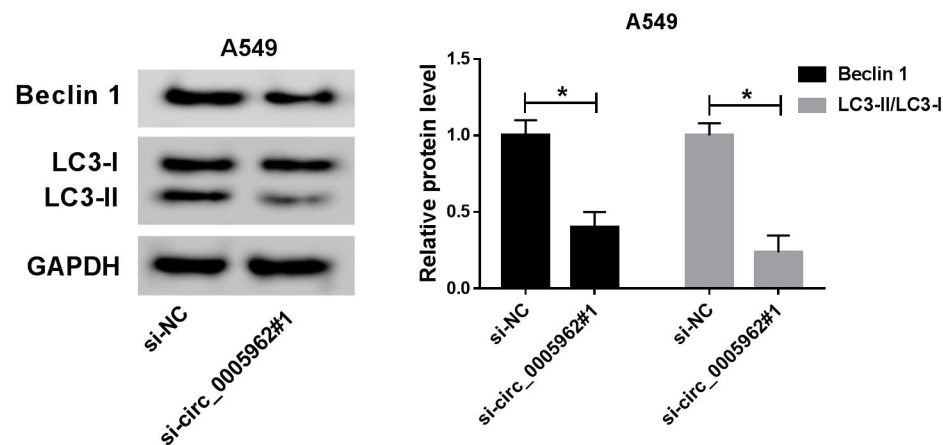**F**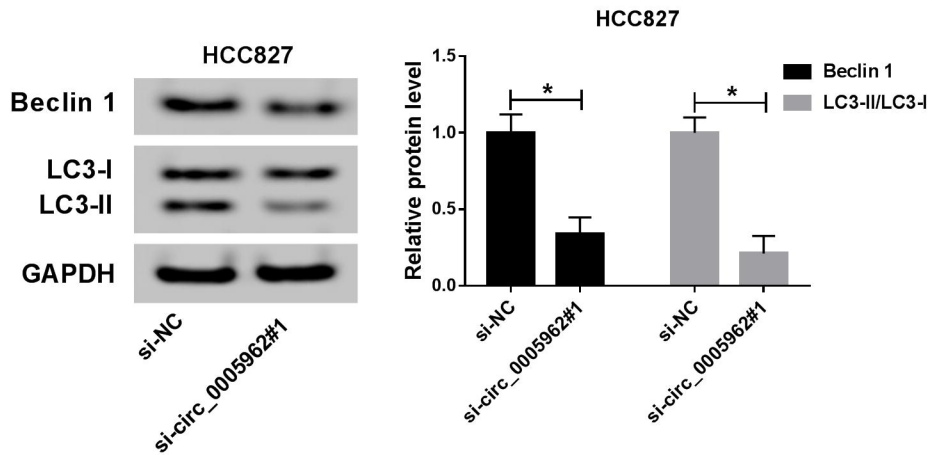**G**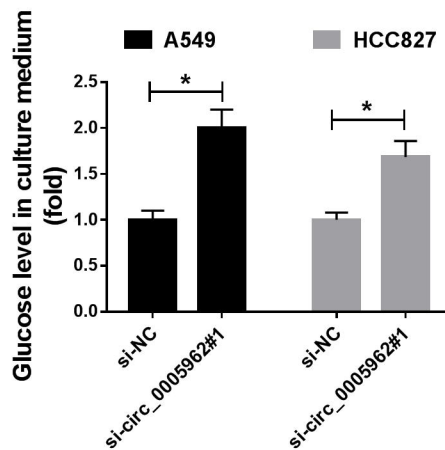**H**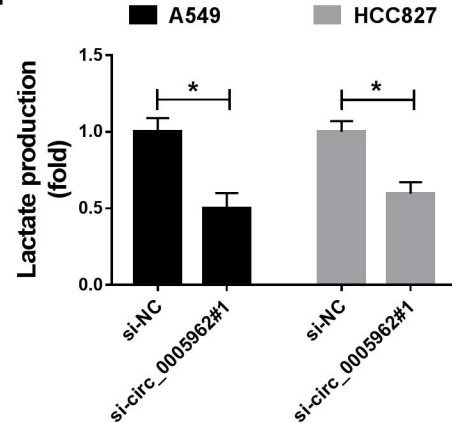

**A**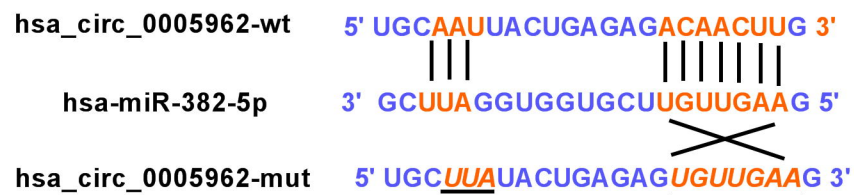**B**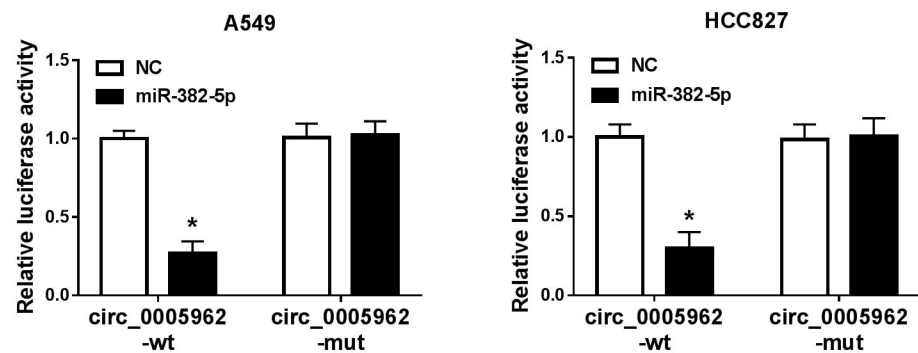**C**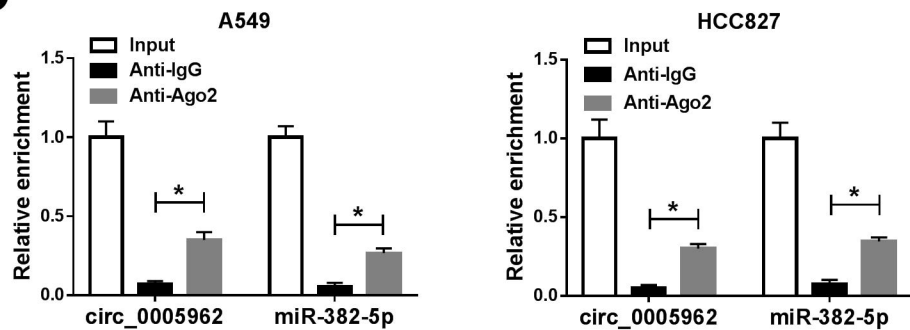**D**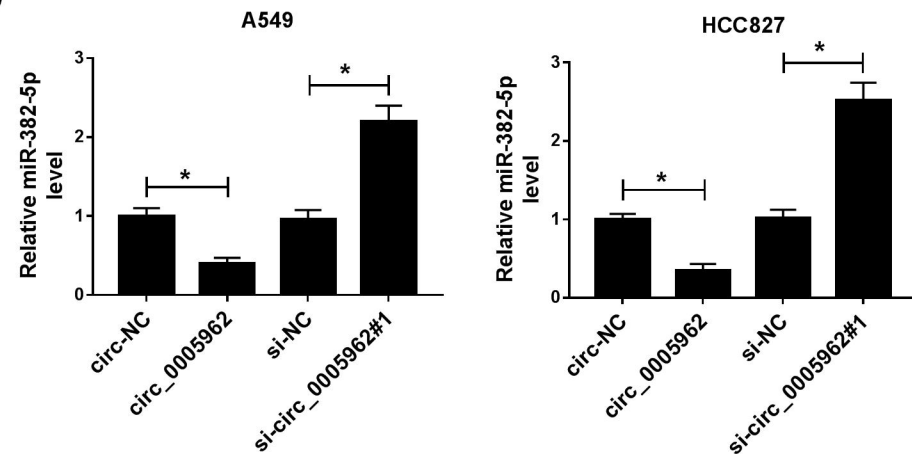**E**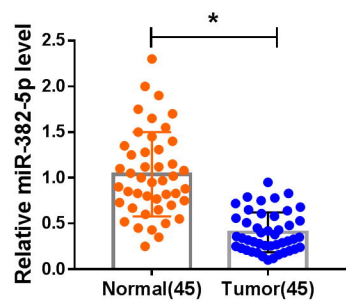**F**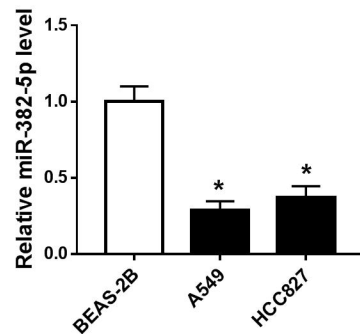**G**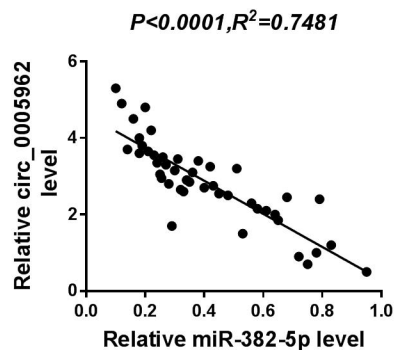

**A**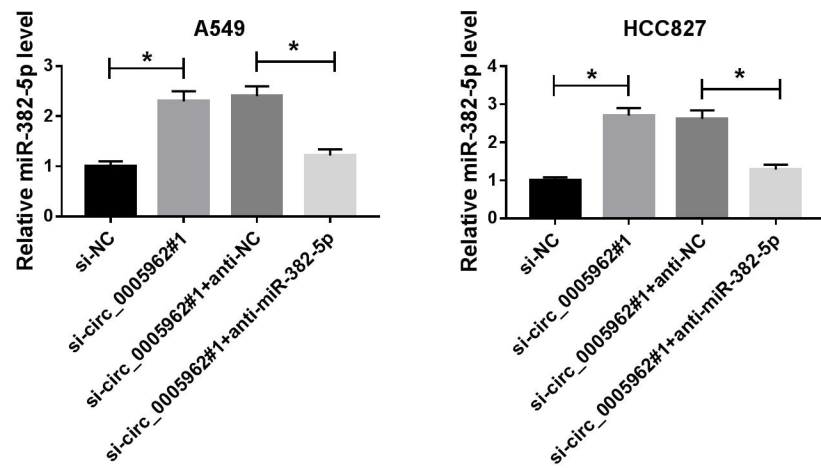**B**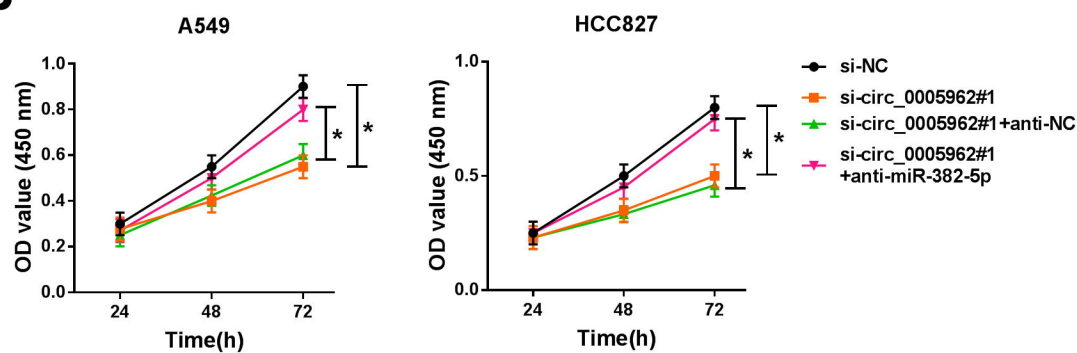**C**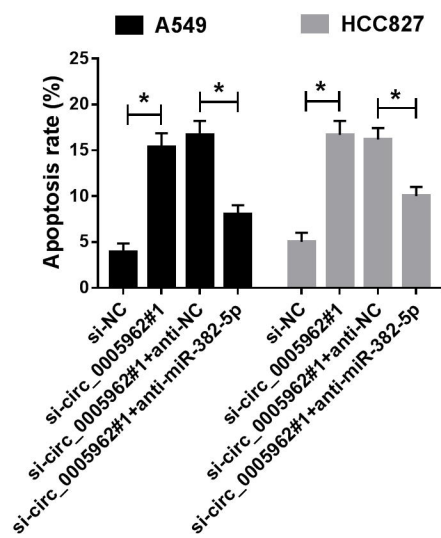**D**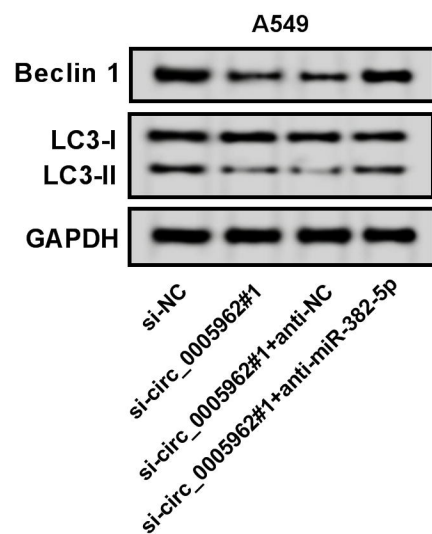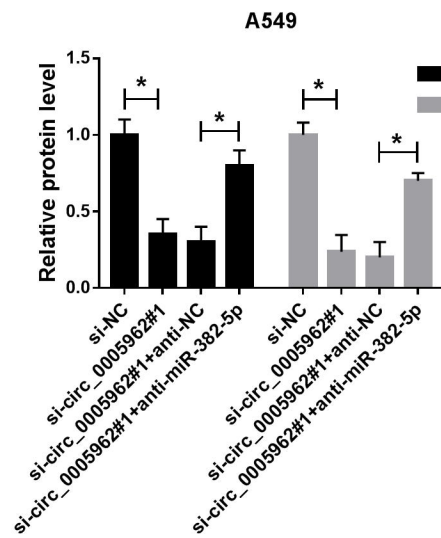**E**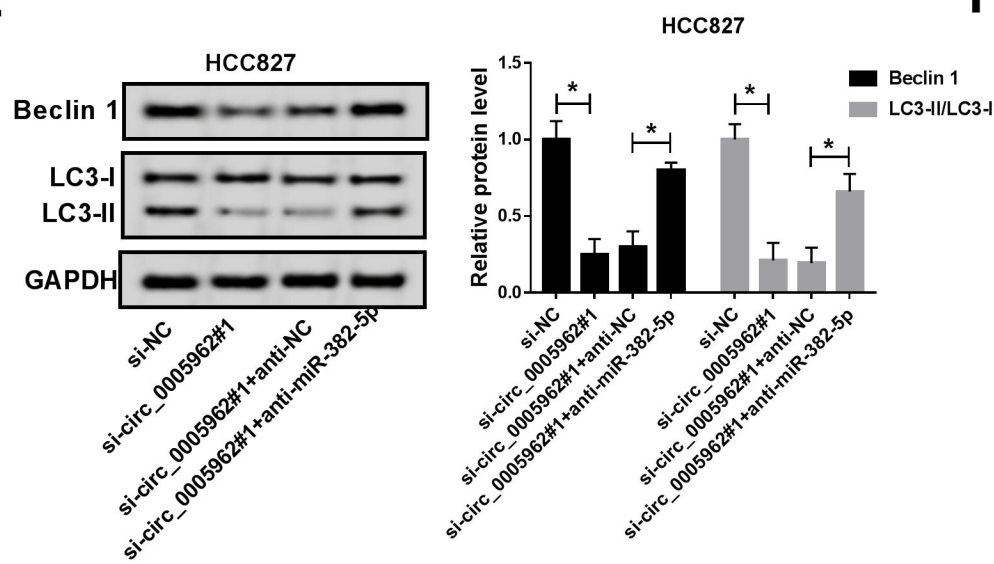**F**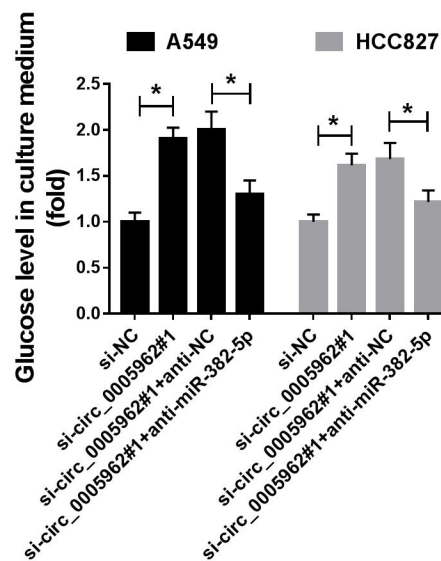**G**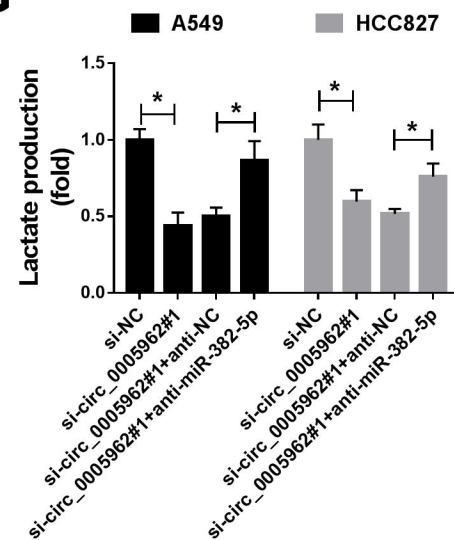

**A**

PDK4-wt 3' UTR

hsa-miR-382-5p

PDK4-mut 3' UTR

Target: 5' uugcagugaaggcauCAACUUa 3'

miRNA : 3' gcuuagguggugcuuGUUGAAg 5'

5' uugcagugaaggcauGUUGAAa 3'**B**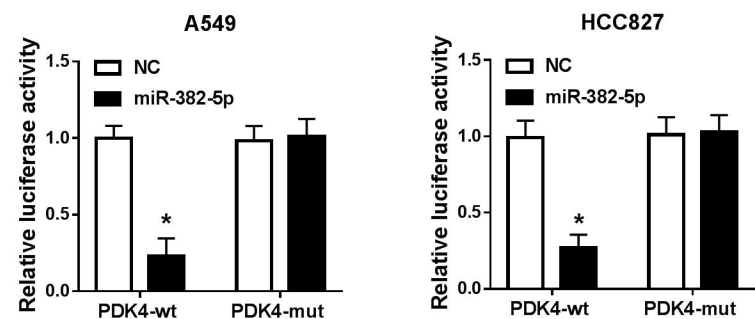**C**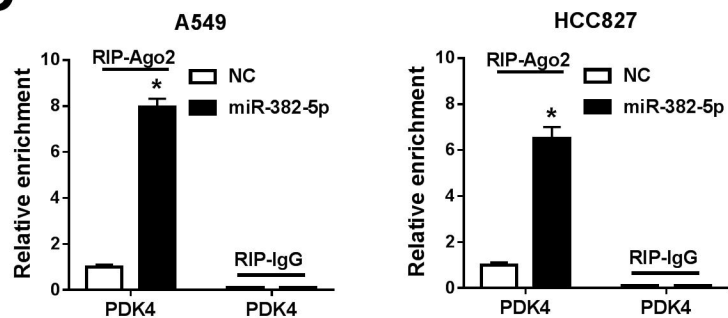**D**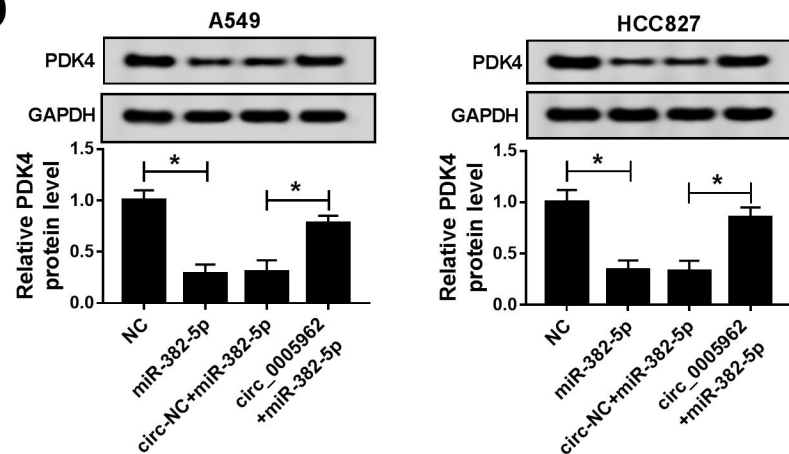**E**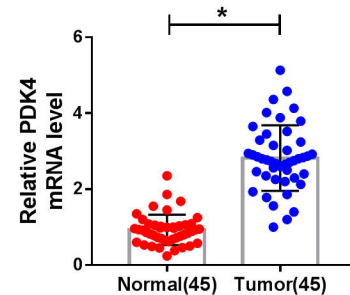**F**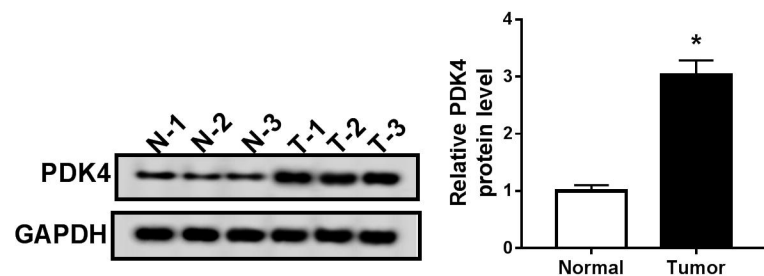**G**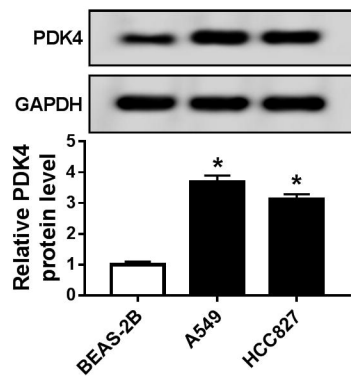**H**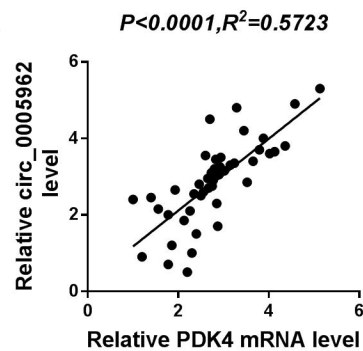**I**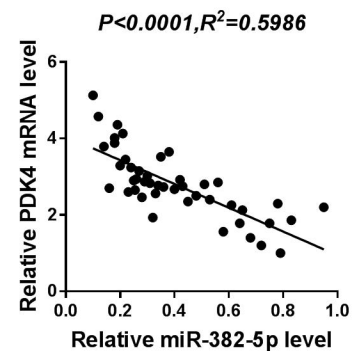

**A**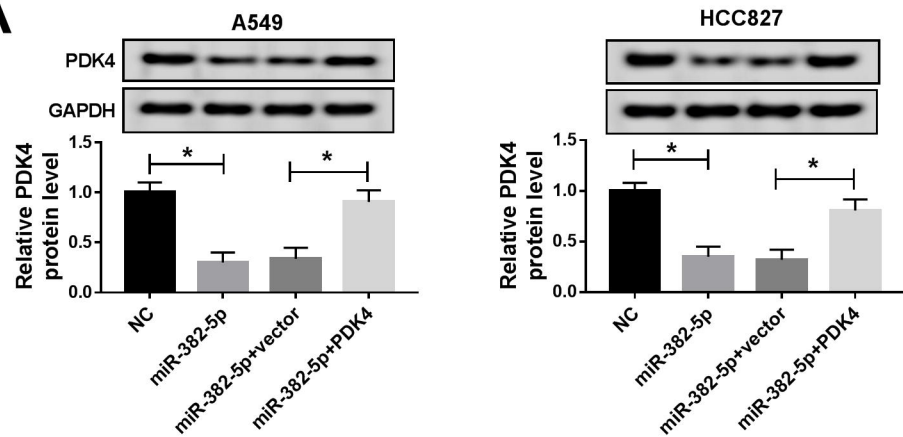**B**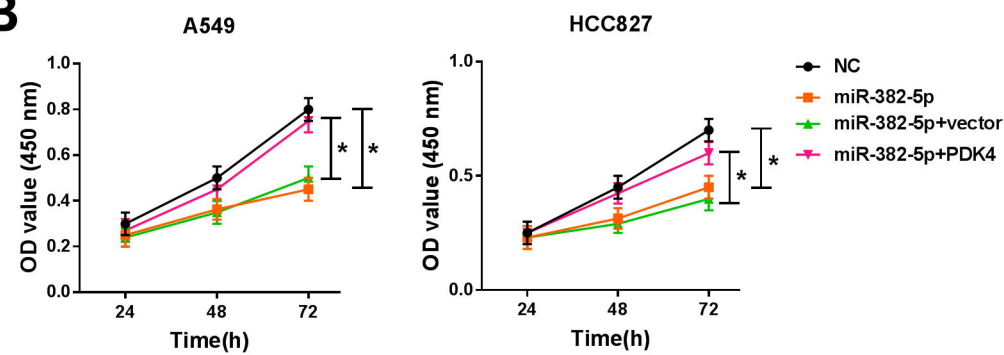**C**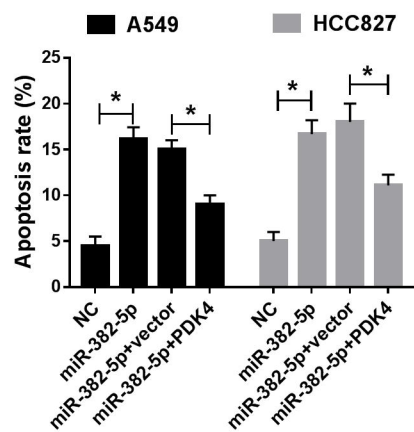**D**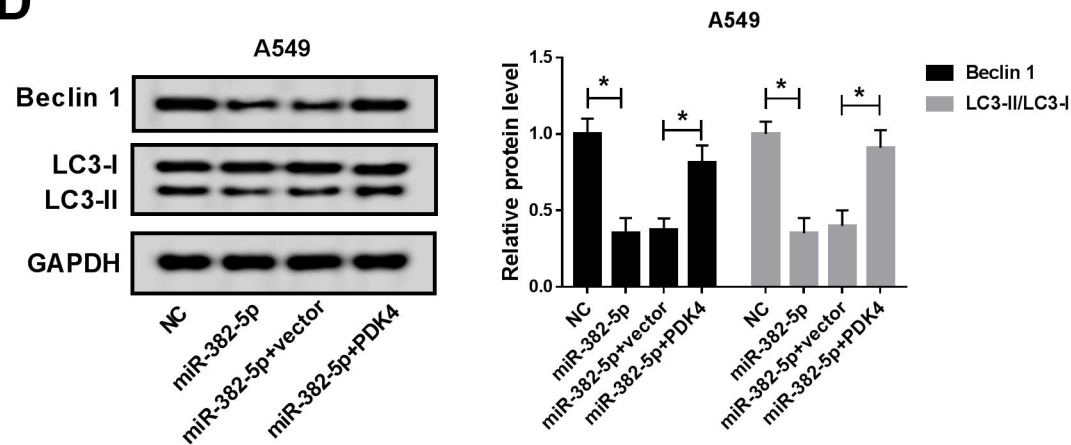**E**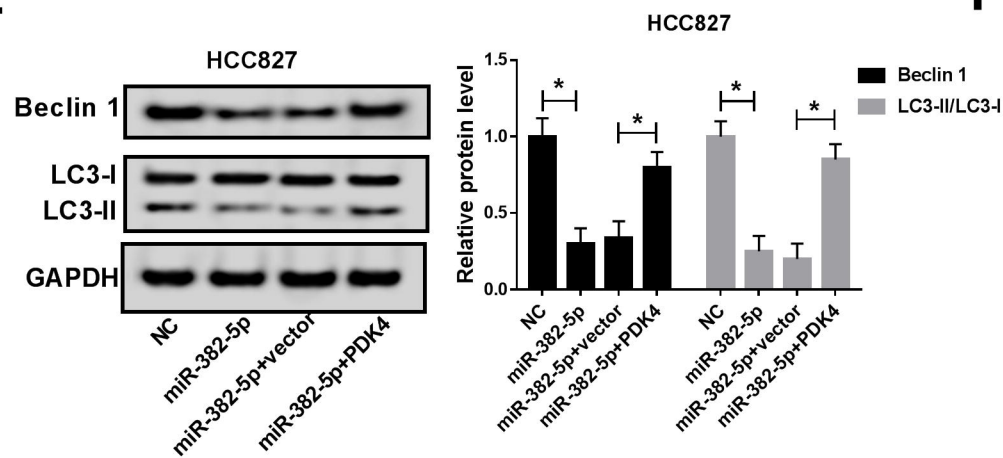**F**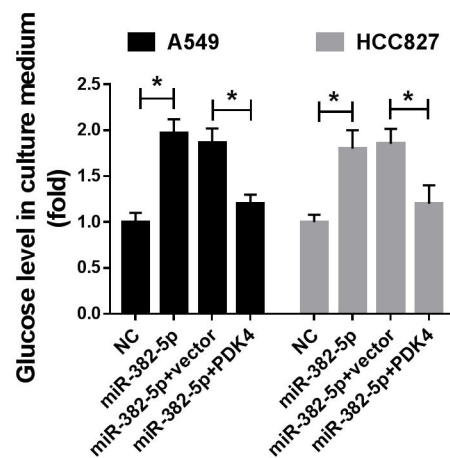**G**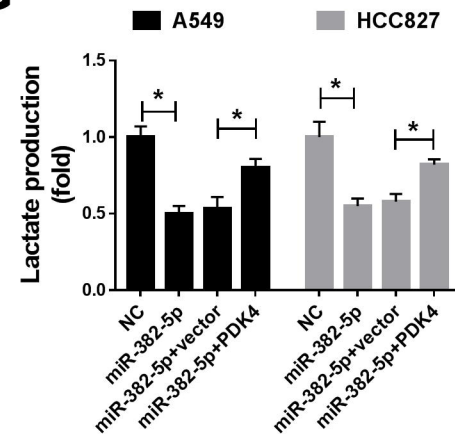

**A**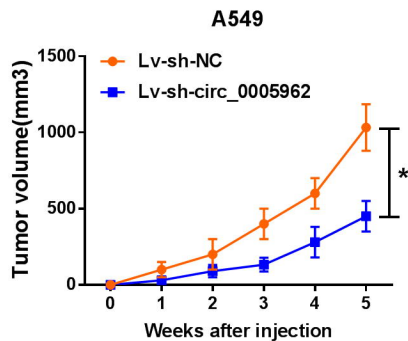**B**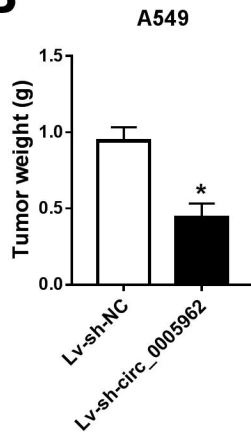**C**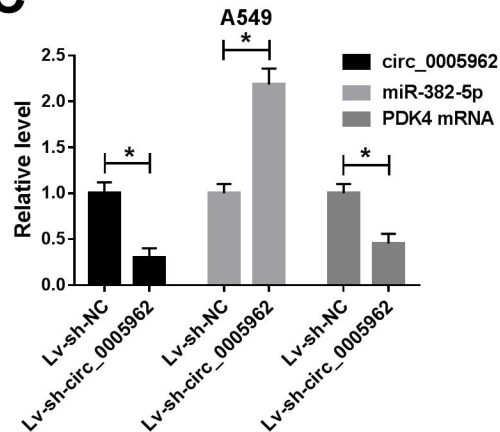**D**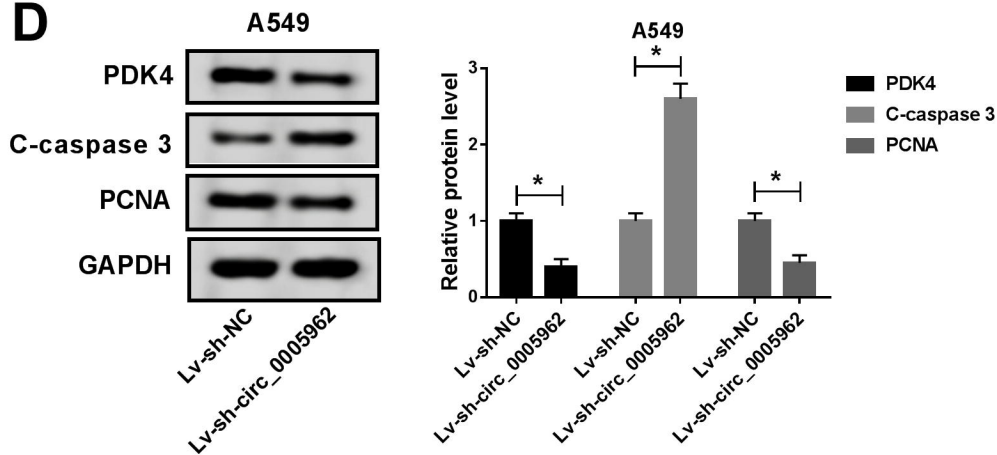

Source: https://www.biorxiv.org/content/biorxiv/early/2020/03/06/2020.03.06.980185.full.pdf
